# Supplementary material for: Metabolomic Approach Based on Analytical Techniques for the Detection of Secondary Metabolites from Humulus lupulus L. Dried Leaves
Source: MDPI journal article supplement (doi:10.3390/ijms241813732), 2023-09-06
Supplement: s1 [file s1]

# Metabolomic approach based on analytical techniques for the detection of secondary metabolites from *Humulus lupulus* L. dried leaves

Cosimo Taiti<sup>1</sup>, Giacomo Di Matteo<sup>2</sup>, Mattia Spano<sup>2</sup>, Vittorio Vinciguerra<sup>3</sup>, Elisa Masi<sup>1</sup>, Luisa Mannina<sup>2</sup>, and Stefania Garzoli<sup>2,\*</sup>

<sup>1</sup> Department of Agriculture, Food, Environmental and Forest, Università di Firenze, Sesto Fiorentino, 50019 Firenze, Italy; cosimo.taiti@unifi.it (C.T.); elisa.masi@unifi.it (E.M.)

<sup>2</sup> Department of Chemistry and Technology of Drug, Sapienza University, 00185, Rome, Italy, giacomo.dimatteo@uniroma1.it (G.D.M.); mattia.spano@uniroma1.it (M.S); luisa.mannina@uniroma1.it (L.M.)

<sup>3</sup> Department for Innovation in Biological Systems, Food and Forestry, University of Tuscia, 01100, Viterbo, Italy, vincigue@unitus.it (V.V.)

\* Correspondence: stefania.garzoli@uniroma1.it (S.G.)

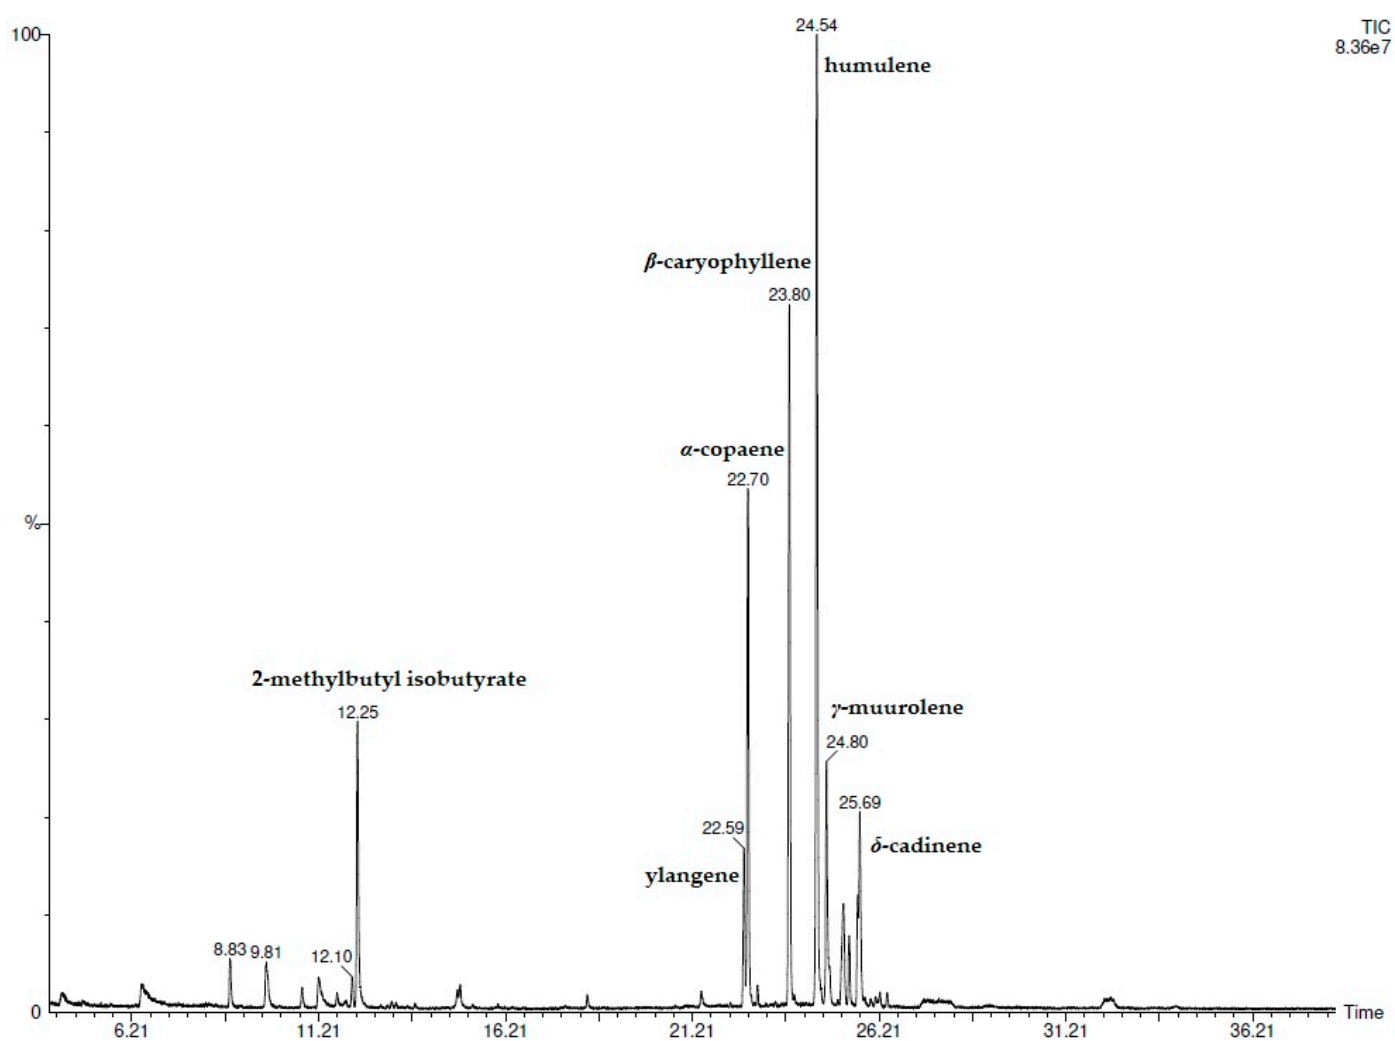

**Figure S1:** SPME-GC-MS chromatogram of the dried hop leaves

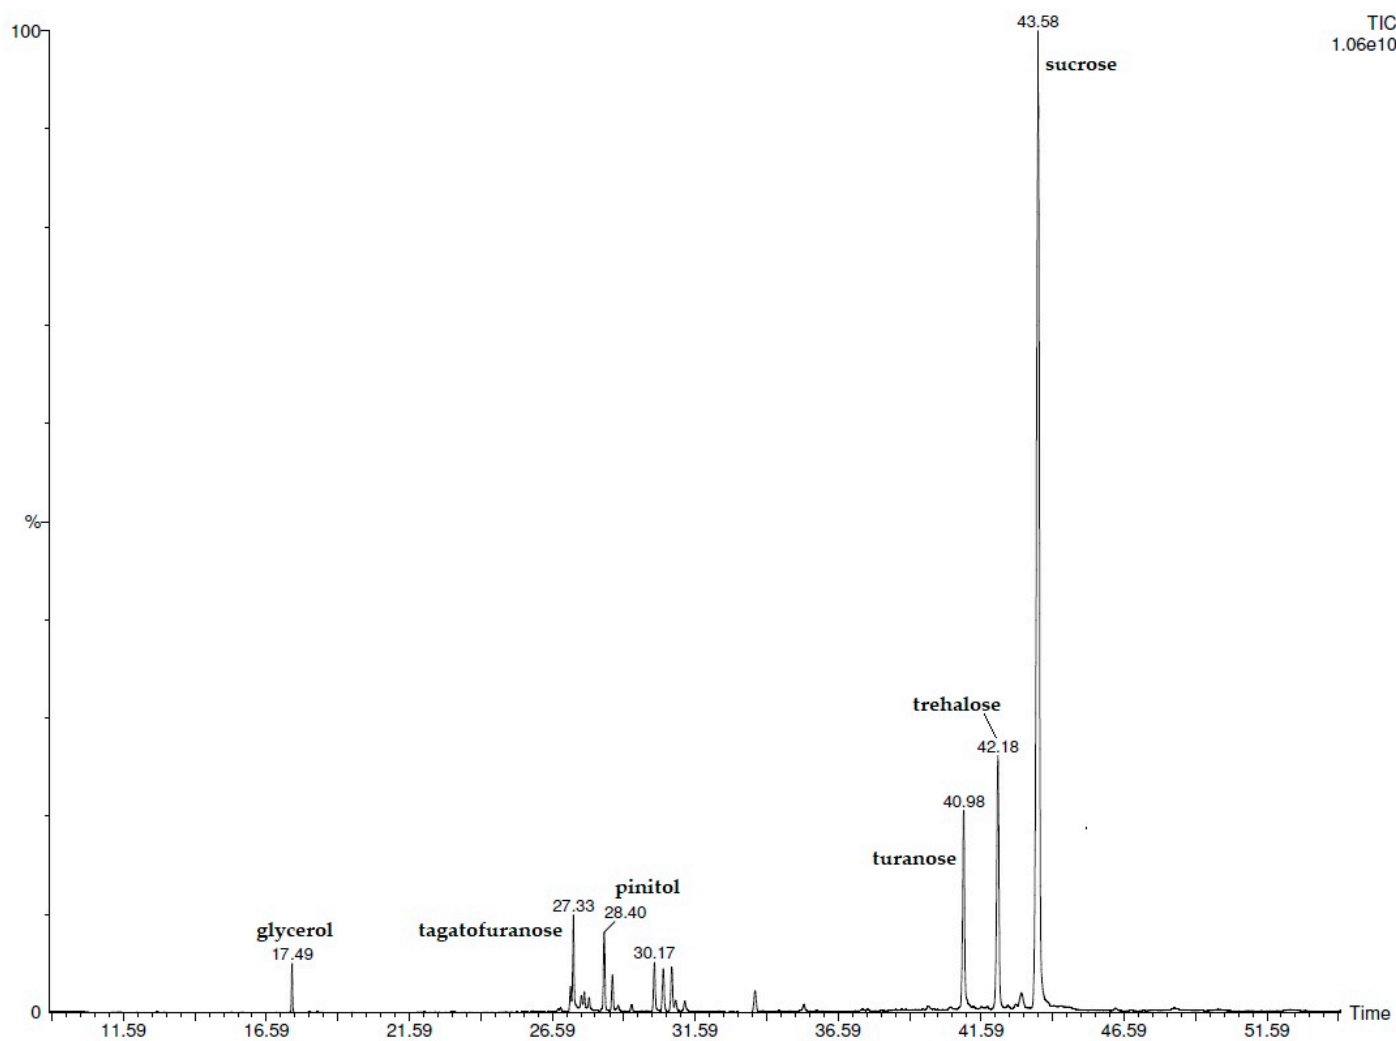

**Figure S2:** GC-MS chromatogram of the methanolic extract after derivatization.

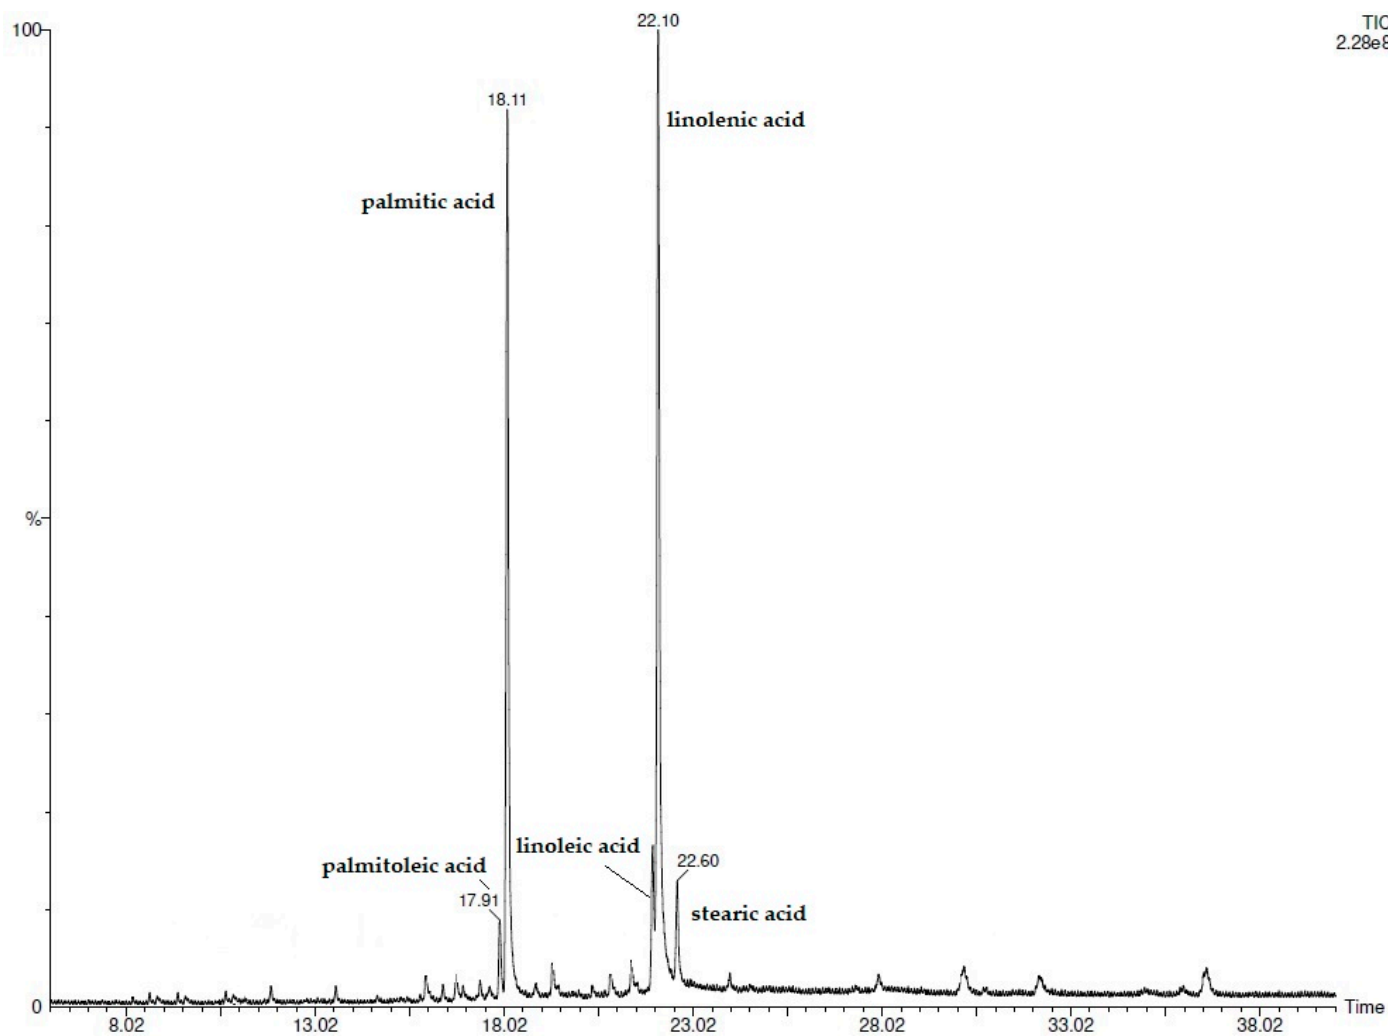

**Figure S3:** GC-MS chromatogram of the transesterified dried leaves extract.

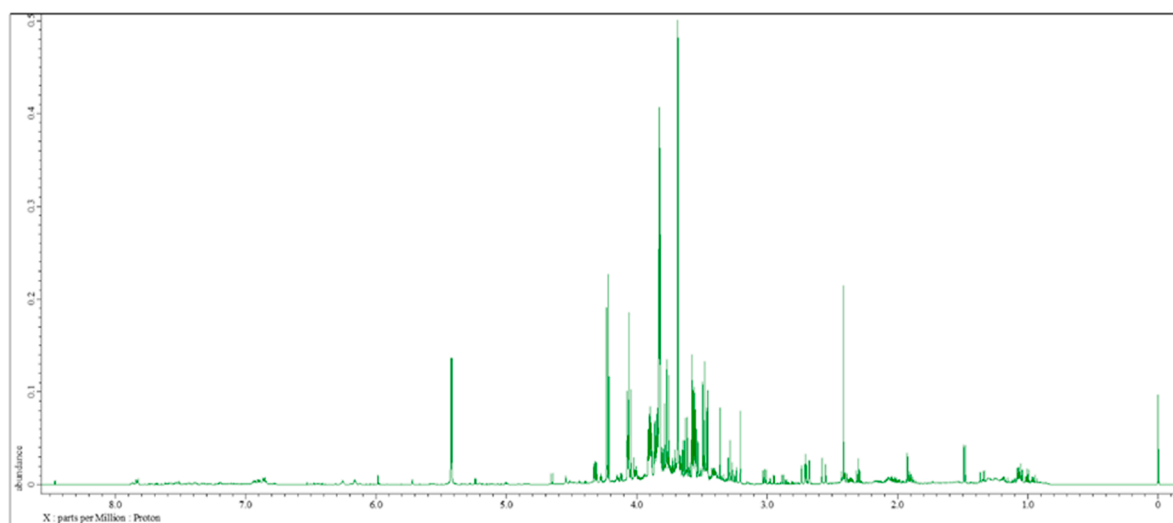

**Figure S4:**  $^1\text{H}$  NMR spectrum of the hydroalcoholic hop leaves fraction in phosphate buffer/ $\text{D}_2\text{O}$ .

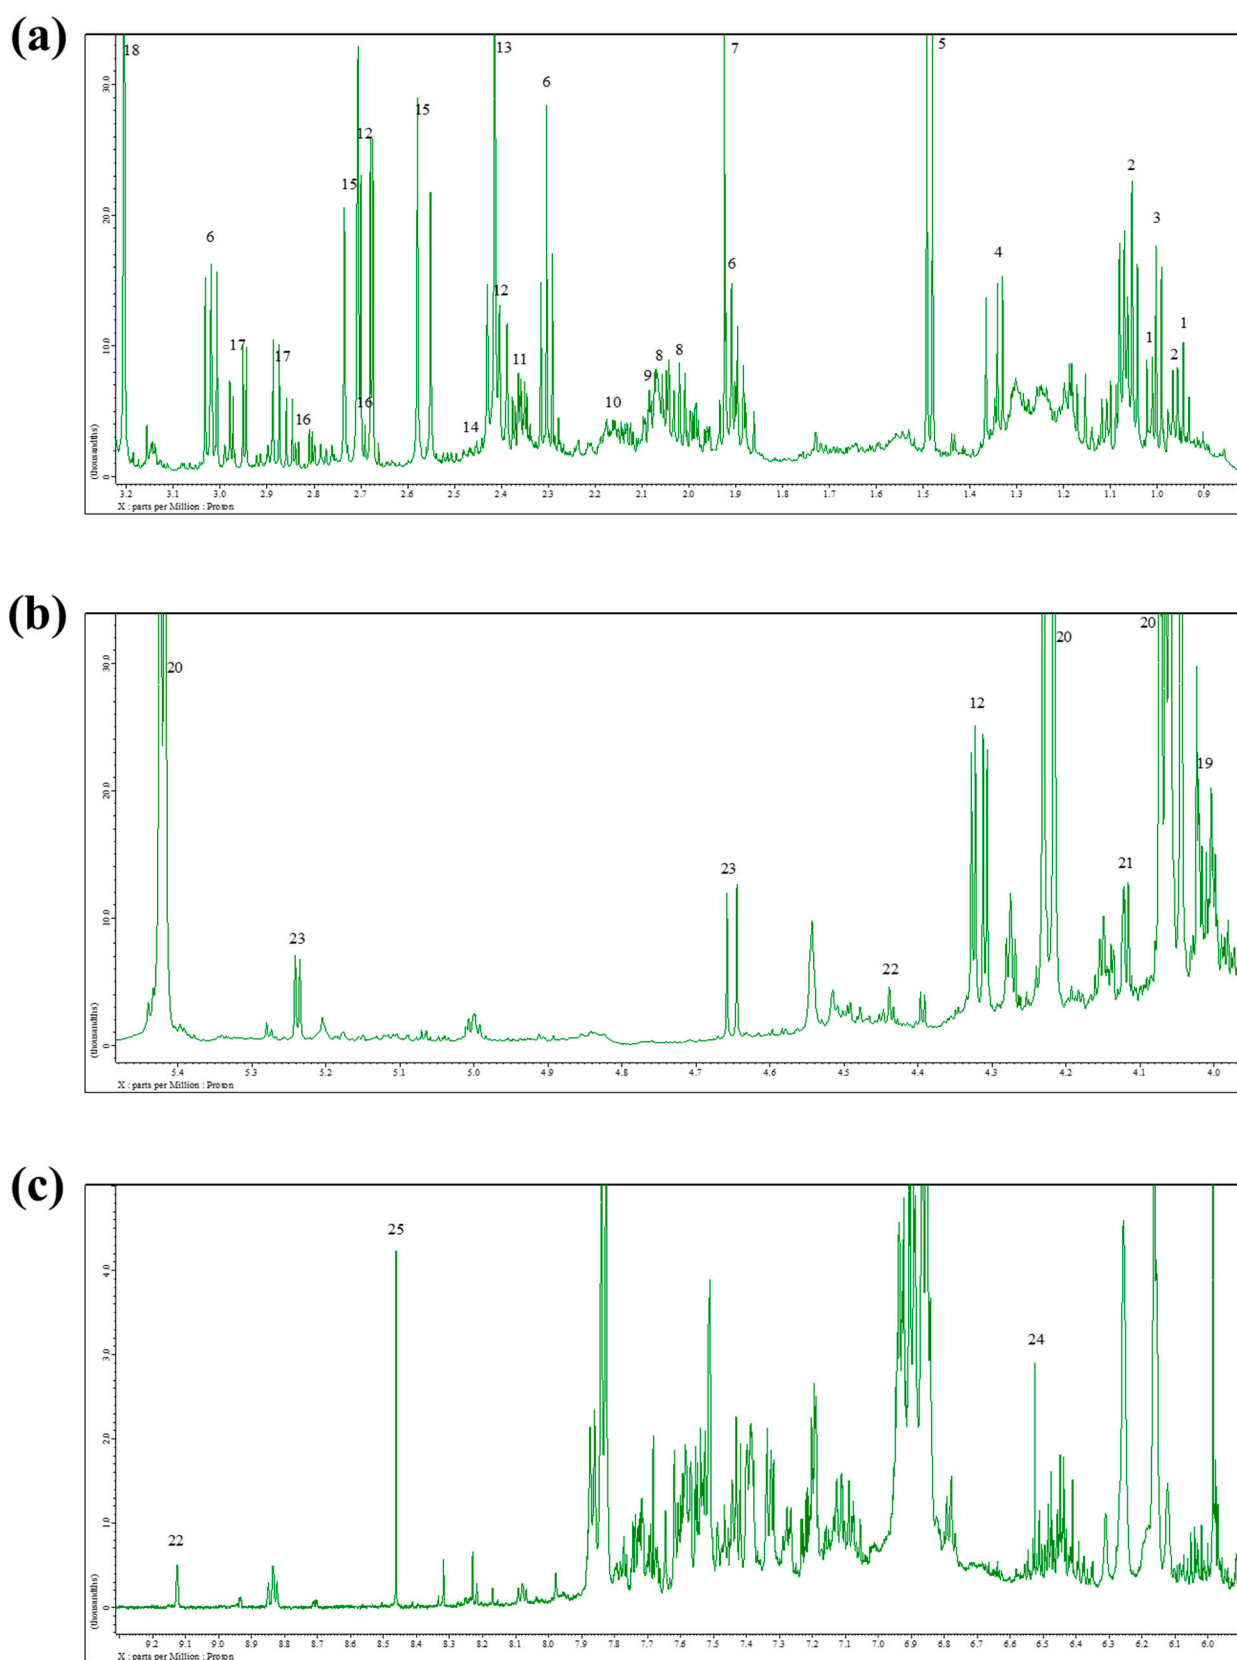

**Figure S5.** Expansions of  $^1\text{H}$  NMR spectrum of the hydroalcoholic hop leaves fraction in phosphate buffer/ $\text{D}_2\text{O}$ : (a) Upfield region; (b) Middle field region; (c) Downfield region.

Assignments: 1, Isoleucine; 2, Leucine; 3, Valine; 4, Threonine; 5, Alanine; 6, GABA; 7, Acetate; 8, Proline; 9, Glutamate; 10, Glutamate + Glutamine; 11, Glutamate + Proline; 12, Malic acid; 13, Succinate; 14, Glutamine; 15, Citrate; 16, Aspartate; 17, Asparagine; 18, Choline; 19,  $\beta$ -D-Fructopyranose; 20, Sucrose; 21,  $\beta$ -D-Fructofuranose; 22, Trigonelline; 23, Glucose; 24, Fumarate; 25, Formate.

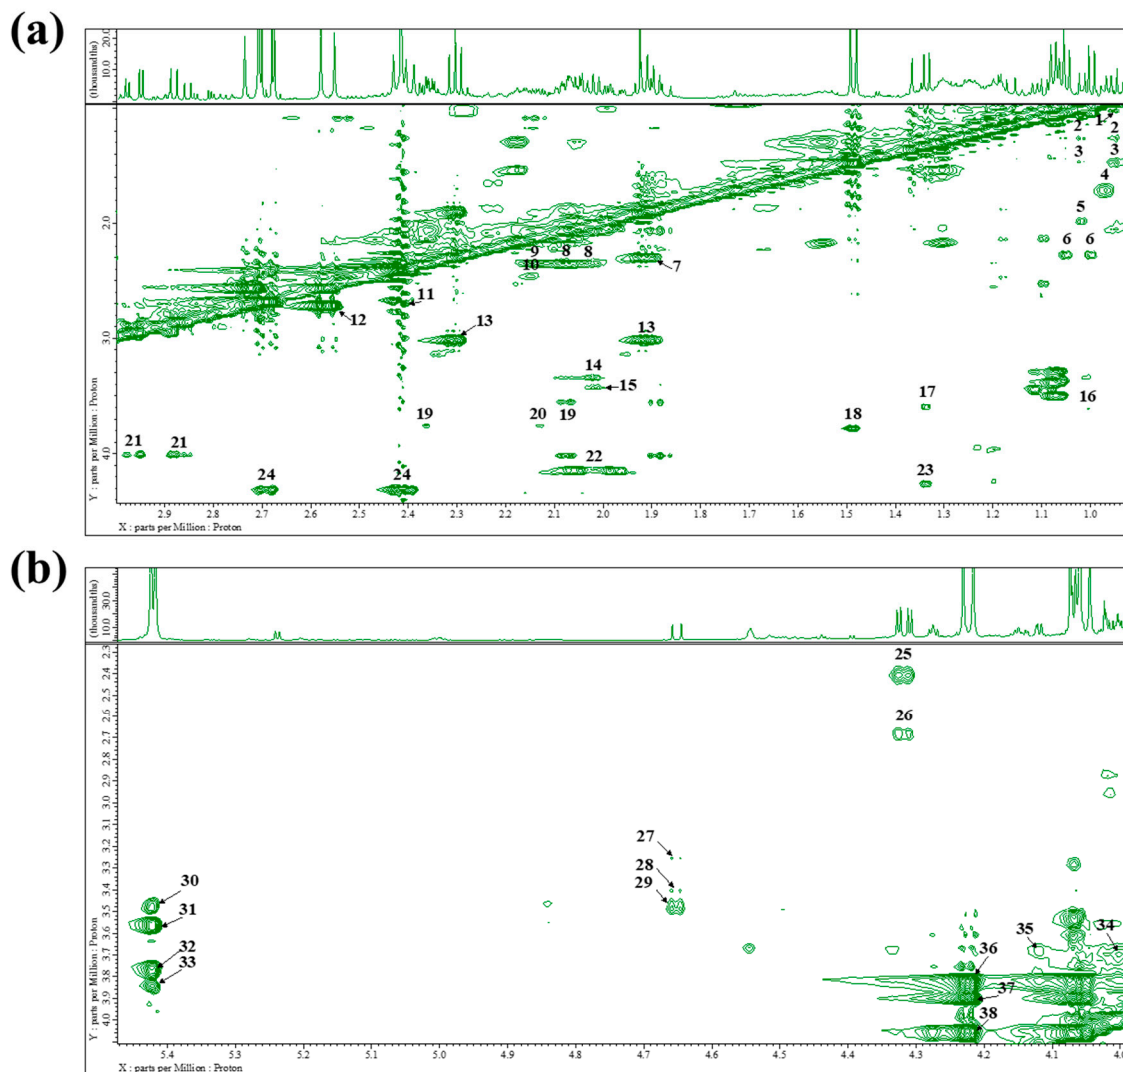

**Figure S6.** Expansions of TOCSY spectrum of hydroalcoholic fraction of hop leaves in phosphate buffer/D<sub>2</sub>O: (a) Upfield region; (b) Middle field region.

Key: Iso, Isoleucine; Leu, Leucine; Val, Valine; Thr, Threonine; Ala, Alanine; Glu, Glutamate; Gln, Glutamine; Pro, Proline; MalA, Malate; CitA, Citrate; Asp, Aspartate;  $\beta$ -Glu,  $\beta$ -Glucose; Suc, Sucrose;  $\beta$ -Fru-pyr,  $\beta$ -D-Fructopyranose;  $\beta$ -Fru-fur,  $\beta$ -Fructofuranose;

Assignments: 1,  $\gamma$ -CH<sub>3</sub> Iso; 2,  $\gamma'$ -CH<sub>2</sub> Iso; 3,  $\gamma$ -CH<sub>2</sub> Iso; 4,  $\gamma$ -CH Leu; 5,  $\beta$ -CH Iso; 6,  $\beta$ -CH Val; 7,  $\alpha$ -CH<sub>2</sub> GABA; 8,  $\beta$ -CH<sub>2</sub> Pro; 9,  $\gamma$ -CH<sub>2</sub> Glu; 10,  $\gamma$ -CH<sub>2</sub> Gln; 11,  $\beta$ -CH MalA; 12,  $\alpha'$ ,  $\gamma'$ -CH CitA; 13,  $\gamma$ -CH<sub>2</sub> GABA; 14,  $\delta$ -CH<sub>2</sub> Pro; 15,  $\delta'$ -CH<sub>2</sub> Pro; 16,  $\alpha$ -CH Val; 17,  $\beta$ -CH Thr; 18,  $\alpha$ -CH Ala; 19,  $\alpha$ -CH Glu; 20,  $\alpha$ -CH Glu,  $\alpha$ -CH Gln; 21,  $\alpha$ -CH Asp; 22,  $\alpha$ -CH Pro; 23,  $\beta$ -CH Thr; 24,  $\alpha$ -CH MalA; 25,  $\beta'$ -CH MalA; 26,  $\beta$ -CH MalA; 27, CH<sub>2</sub>  $\beta$ -Glu; 28, CH<sub>4</sub>  $\beta$ -Glu; 29, CH<sub>3</sub>  $\beta$ -Glu; 30, CH<sub>4</sub> Suc;

31, CH<sub>2</sub> Suc; 32, CH<sub>3</sub> Suc; 33, CH<sub>5</sub> Suc; 34, CH<sub>6</sub> β-Fru-pyr; 35, CH<sub>6</sub> β-Fru-fur; 36, CH<sub>6</sub>' Suc; 37, CH<sub>5</sub>' Suc; 38, CH<sub>4</sub>' Suc.

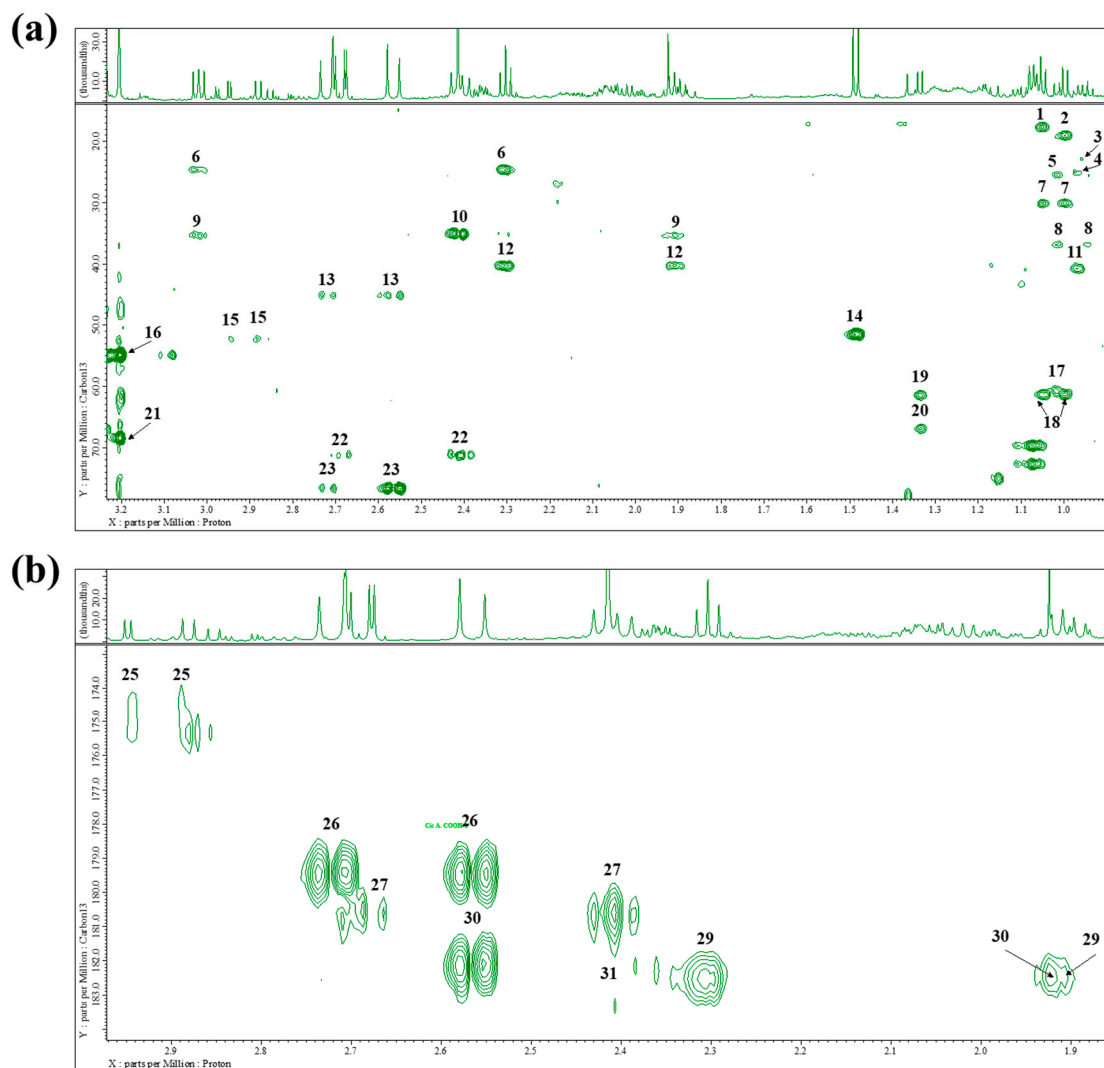

**Figure S7.** Expansions of HMBC spectrum of the hydroalcoholic hop leaves fraction in phosphate buffer/D<sub>2</sub>O: (a) Upfield region; (b) Carboxylic region.

Key: Iso, Isoleucine; Leu, Leucine; Val, Valine; Thr, Threonine; Ala, Alanine; Glu, Glutamate; Gln, Glutamine; Pro, Proline; MalA, Malate; CitA, Citrate; Asp, Aspartate; β-Glu, β-Glucose; Suc, Sucrose; β-Fru-pyr, β-D-Fructopyranose; β-Fru-fur, β-Fructofuranose; SucA, Succinate; Asn, Asparagine; Cho, Choline;

Assignments: 1, γ-CH<sub>3</sub> Val; 2, γ'-CH<sub>3</sub> Val; 3, δ-CH<sub>3</sub> Leu; 4, γ-CH Leu; 5, γ-CH<sub>2</sub> Iso; 6, β-CH<sub>2</sub> GABA; 7, β-CH Val; 8, β-CH Iso; 9, α-CH GABA; 10, α,β-CH<sub>2</sub> SucA; 11, β-CH<sub>2</sub> Leu; 12, γ-CH<sub>2</sub> GABA; 13, CH CitA; 14, α-CH Ala; 15, α-CH Asn; 16, N(CH<sub>3</sub>)<sub>3</sub> Cho; 17, α-CH Iso; 18, α-CH Val; 19, α-CH Thr; 20, β-CH Thr; 21, α-CH<sub>2</sub> Cho; 22, α-CH MalA; 23, β-C CitA; 24, COOH Ala; 25, COOH Asn; 26, COOH-1 CitA; 27, COOH-4 MalA; 28, COOH GABA; 29, COOH AceA; 30, COOH-6 CitA; 31, COOH 1,4 SucA.

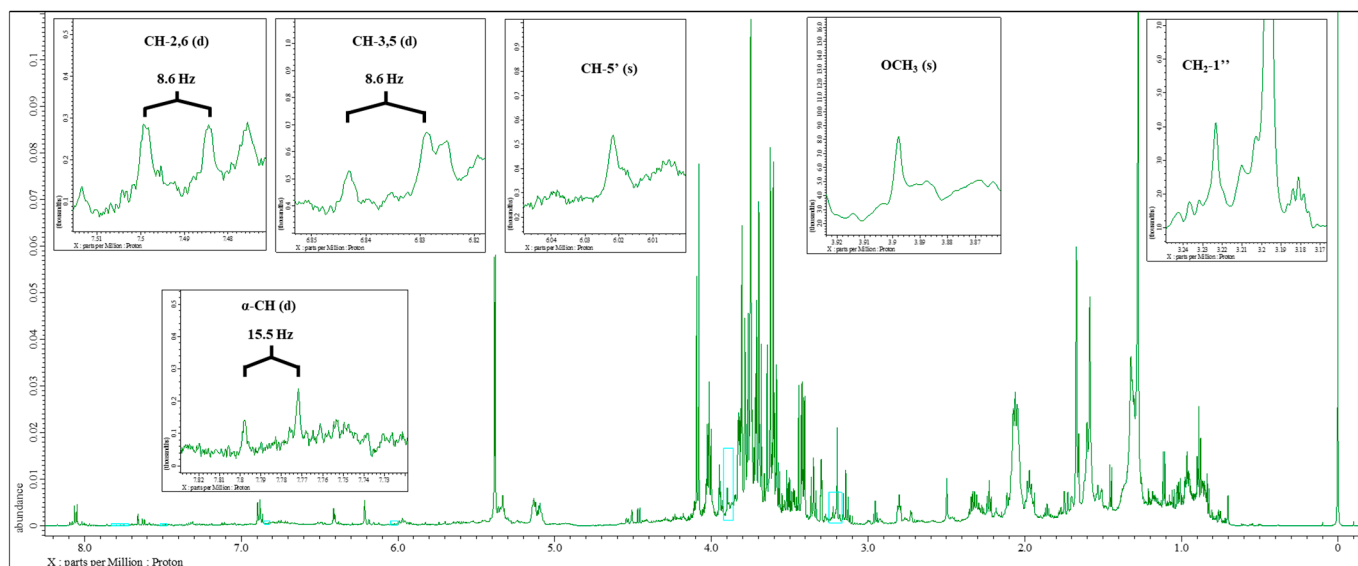

**Figure S8.**  $^1\text{H}$  NMR spectrum of the methanolic hop leaves extract in methanol- $\text{d}_4$  with the expansion of xanthohumol assignments.

### NMR quantification

For the absolute quantification of each target compound the following equation was applied to convert the integrated peak area to a concentration in  $\text{mg}/100\text{g}$ :

$$c_T = \frac{I_T}{I_{St}} \times \frac{x_{St}}{x_T} \times \frac{c_{St}}{m_M} \times \frac{V_{St}}{10} \times M_T$$

$c_T$  concentration of the target compound in the hop leaves matrix [ $\text{mg}/100\text{g}$ ];

$M_T$  molecular weight of target compound [ $\text{g}/\text{mol}$ ]

$I_T$  relative integral value of  $^1\text{H}$  NMR signal of the target compound

$I_{St}$  relative integral value of  $^1\text{H}$  NMR signal of the standard compound

$x_{St}$  number of protons belonging to the  $^1\text{H}$  NMR signal of the standard compound (9 for TSP internal standard)

$x_T$  number of protons belonging to the  $^1\text{H}$  NMR signal of the target compound

$c_{St}$  concentration of standard compound in the solution used for  $^1\text{H}$  NMR measurement [ $\text{mmol}/\text{L}$ ]

$V_{St}$  volume of solution used for  $^1\text{H}$  NMR measurement [ $\text{mL}$ ]

$m_M$  weight of hop leaves matrix used for the extraction [ $\text{g}$ ]

10 factor to convert the final concentration to  $\text{mg}/100\text{g}$



**Table S1.** Chemical volatile composition (with identifiers: InChIkey) of the dried hop leaves as determined by SPME-GC-MS.

| N° | COMPONENT <sup>1</sup>    | Identifiers                 |
|----|---------------------------|-----------------------------|
| 1  | isobutyric acid           | KQNPFTWMSNSAP-UHFFFAOYSA-N  |
| 2  | propionic acid            | XBDQKXXYIPTUBI-UHFFFAOYSA-N |
| 3  | 5-hepten-2-one, 6-methyl- | UHEPJGULSIKKTP-UHFFFAOYSA-N |
| 4  | 2-methylbutyl isobutyrate | DUAXUBMIVRZGCO-UHFFFAOYSA-N |
| 5  | $\beta$ -myrcene          | UAHWPYUMFXYFJY-UHFFFAOYSA-N |
| 6  | amyl isovalerate          | QURFFFCYNQXLCU-UHFFFAOYSA-N |
| 7  | $\beta$ -cyclocitral      | MOQGCGNUWBPQTQ-UHFFFAOYSA-N |
| 8  | ylangene                  | VLXDPFLIRFYIME-XTLGRWLVSAN  |
| 9  | $\alpha$ -copaene         | VLXDPFLIRFYIME-UHFFFAOYSA-N |
| 10 | $\beta$ -bourbonene       | YIRAHEODBQONHI-XTLGRWLVSAN  |
| 11 | $\beta$ -caryophyllene    | NPNUFJAVOONJE-IOMPXFEGSAN   |
| 12 | $\alpha$ -humulene        | FAMPSKZZVDUYOS-HRGUGZIWSAN  |
| 14 | $\gamma$ -muurolene       | WRHGORWNJGOVQY-ZNMIVQPWSAN  |
| 13 | $\beta$ -eudesmene        | YOVSPTNQHMDJAG-ZNMIVQPWSAN  |
| 15 | $\alpha$ -selinene        | OZQAPQSEYFAMCY-GIJTGMTSAN   |
| 16 | $\gamma$ -cadinene        | WRHGORWNJGOVQY-RBSFLKMASAN  |
| 17 | $\delta$ -cadinene        | FUCYIEXQVQJBKY-HIFRSBDPSAN  |
| 18 | selina-3,7(11)-diene      | WNRBYZQFEBIUGD-CABCVRRESAN  |

**Table S2.** Chemical composition (with identifiers: InChIkey) of *H. lupulus* dried leaves identified via PTR-ToF-MS.

| N° of compounds | <i>m/z</i> | Chemical Formula                                          | Tentative Identification           | Identifiers                 |
|-----------------|------------|-----------------------------------------------------------|------------------------------------|-----------------------------|
| 1               | 27.022     | C <sub>2</sub> H <sub>3</sub> <sup>+</sup>                | Acetylene                          | HSFWRNGVRCDJHI-UHFFFAOYSA-N |
| 2               | 31.018     | CH <sub>3</sub> O <sup>+</sup>                            | Formaldehyde                       | WSFSSNUMVMOOMR-UHFFFAOYSA-N |
| 3               | 33.033     | CH <sub>5</sub> O <sup>+</sup>                            | Methanol                           | OKKJLVBELUTLKV-UHFFFAOYSA-N |
| 4               | 41.038     | C <sub>3</sub> H <sub>5</sub> <sup>+</sup>                | Alkyllic fragment                  | not determinable            |
| 5               | 43.018     | C <sub>2</sub> H <sub>3</sub> O <sup>+</sup>              | Aldehyde fragment                  | not determinable            |
| 6               | 43.054     | C <sub>3</sub> H <sub>7</sub> <sup>+</sup>                | General alkane/VOC fragment        | not determinable            |
| 7               | 45.033     | C <sub>2</sub> H <sub>5</sub> O <sup>+</sup>              | Acetaldehyde                       | IKHGUXGNUITLKF-UHFFFAOYSA-N |
| 8               | 47.013     | CH <sub>3</sub> O <sub>2</sub> <sup>+</sup>               | Formic acid/formates               | not determinable            |
| 9               | 49.011     | CH <sub>5</sub> S <sup>+</sup>                            | S Compound (methanethiol)          | not determinable            |
| 10              | 55.054     | C <sub>4</sub> H <sub>7</sub> <sup>+</sup>                | Fragment                           | not determinable            |
| 11              | 57.069     | C <sub>4</sub> H <sub>9</sub> <sup>+</sup>                | Alcohol fragment                   | not determinable            |
| 12              | 59.049     | C <sub>3</sub> H <sub>7</sub> O <sup>+</sup>              | Propanal, Acetone                  | not determinable            |
| 13              | 61.028     | C <sub>2</sub> H <sub>5</sub> O <sub>2</sub> <sup>+</sup> | Acetates                           | not determinable            |
| 14              | 69.069     | C <sub>5</sub> H <sub>9</sub> <sup>+</sup>                | Isoprene/Cycloalkane fragment      | not determinable            |
| 15              | 71.049     | C <sub>4</sub> H <sub>7</sub> O <sup>+</sup>              | Butenal                            | not determinable            |
| 16              | 73.065     | C <sub>4</sub> H <sub>9</sub> O <sup>+</sup>              | Isobutanal/butanone/methylpropanal | not determinable            |
| 17              | 83.086     | C <sub>6</sub> H <sub>11</sub> <sup>+</sup>               | C6 compounds (hexenal, hexenols)   | not determinable            |
| 18              | 85.065     | C <sub>5</sub> H <sub>9</sub> O <sup>+</sup>              | Methyl butenal                     | not determinable            |

|    |         |                                                           |                                |                  |
|----|---------|-----------------------------------------------------------|--------------------------------|------------------|
| 19 | 87.044  | C <sub>4</sub> H <sub>7</sub> O <sub>2</sub> <sup>+</sup> | 2,3-Butanedione; Butyrolactone | not determinable |
| 20 | 87.080  | C <sub>5</sub> H <sub>11</sub> O <sup>+</sup>             | Pentanal/3-methylbutanal       | not determinable |
| 21 | 93.069  | C <sub>7</sub> H <sub>9</sub> <sup>+</sup>                | Terpene fragment               | not determinable |
| 22 | 107.086 | C <sub>8</sub> H <sub>11</sub> <sup>+</sup>               | Terpene fragment               | not determinable |
| 23 | 109.101 | C <sub>8</sub> H <sub>13</sub> <sup>+</sup>               | Terpene fragment               | not determinable |
| 24 | 133.101 | C <sub>10</sub> H <sub>13</sub> <sup>+</sup>              | Terpene fragment               | not determinable |
| 25 | 205.195 | C <sub>15</sub> H <sub>25</sub> <sup>+</sup>              | Sesquiterpenes like compounds  | not determinable |

**Table S3.** FAs content (with identifiers: InChIKey) of the transesterified extract, as determined by GC-MS.

| N° | COMPONENT <sup>1</sup>             | Identifiers                 |
|----|------------------------------------|-----------------------------|
| 1  | palmitoleic acid, C16:1 <i>n</i> 7 | SECPZKHBENQXJG-FPLPWBNSA-N  |
| 2  | palmitic acid, C16:0               | IPCSVZSSVZVIGE-UHFFFAOYSA-N |
| 3  | linoleic acid, C18:2 <i>n</i> 6    | OYHQOLUKZRVURQ-HZJYTTRNSA-N |
| 4  | linolenic acid, C18:3 <i>n</i> 3   | DTOSIQBPVRVQHS-PDBXOOCHSA-N |
| 5  | stearic acid, C18:0                | QIQXTHQIDYTFRH-UHFFFAOYSA-N |

**Table S4.** Chemical composition (with identifiers: InChIKey) of dried leaves methanolic extract after derivatization, as determined by GC-MS.

| N°                   | COMPONENTS      | (%)                         |
|----------------------|-----------------|-----------------------------|
| <b>Sugars</b>        |                 |                             |
| 1                    | D-lyxose        | SRBFZHDQGSBBOR-AGQMPKSLSA-N |
| 2                    | galactofuranose | AVVWPBAENSWJCB-RSVSWTKNSA-N |
| 3                    | xylose          | PYMYPHUHKUWMLA-VPENINKCSA-N |
| 4                    | sorbofuranose   | RFSUNEUAIZKAJO-IANNHFEVSA-N |
| 5                    | tagatofuranose  | RFSUNEUAIZKAJO-OEXCPVAWSA-N |
| 6                    | glucose         | WQZGKKKJIJFFOK-MDMQIMBFSA-N |
| 7                    | fructose        | BJHIKXHVCXFQLS-UYFOZJQFSA-N |
| 8                    | D-glucopyranose | WQZGKKKJIJFFOK-GASJEMHNSA-N |
| 9                    | allofuranose    | AVVWPBAENSWJCB-CBPJZXOFSAN  |
| 10                   | talofuranose    | AVVWPBAENSWJCB-QTVWNMPRSA-N |
| 11                   | turanose        | RULSWEULPANCDV-PIXUTMIVSA-N |
| 12                   | trehalose       | HDTRYLNUVZCQOY-LIZSDCNHBN   |
| 13                   | sucrose         | CZMRCDWAGMRECN-SFOFJGFUSA-N |
| <b>Organic acids</b> |                 |                             |
| 14                   | lactic acid     | JVTAAEKCZFNVCJ-UHFFFAOYSA-N |
| 15                   | oxalic acid     | MUBZPKHOEPUJKR-UHFFFAOYSA-N |
| 16                   | succinic acid   | KDYFGRWQOYBRFD-UHFFFAOYSA-N |
| 17                   | pyruvic acid    | LCTONWCANYUPML-UHFFFAOYSA-N |
| 18                   | malonic acid    | OFOBLEOULBTSOW-UHFFFAOYSA-N |
| <b>Alcohols</b>      |                 |                             |

|    |              |                             |
|----|--------------|-----------------------------|
| 19 | D-pinitol    | DSCFFEYYQKSRSV-FEPQRWDDSA-N |
| 20 | glycerol     | PEDCQBHIVMGVHV-UHFFFAOYSA-N |
| 21 | ribitol      | HEBKCHPVOIAQTA-NGQZWQHPSA-N |
| 22 | phytol       | BOTWFXYSFPMFNR-PYDDKJGSSA-N |
| 23 | myo-inositol | CDAISMWEOUEBRE-UHFFFAOYSA-N |

**Table S5.** Metabolites identified in the 600.13 MHz  $^1\text{H}$  NMR,  $^1\text{H}$ - $^1\text{H}$  TOCSY and  $^1\text{H}$ - $^{13}\text{C}$  HMBC spectra of Bligh–Dyer hydroalcoholic extracts (with identifiers: InChIKey) of hop leaves in phosphate buffer/ $\text{D}_2\text{O}$  acquired at 25 °C.

| Compound                  | Identifiers                  |
|---------------------------|------------------------------|
| $\beta$ -D-Fructofuranose | RFSUNEUAIZKAJO-ARQDHWQXSA-N  |
| $\beta$ -D-Fructopyranose | LKDRXBCSQODPBY-ARQDHWQXSA-N  |
| $\alpha$ -Glucose         | WQZGKKKJIFFOK-MDMQIMBFSA-N   |
| $\beta$ -D-Glucose        | WQZGKKKJIFFOK-VFUOTHLCSA-N   |
| Sucrose                   | CZMRCDWAGMREC-N-SFOFJGFUSA-N |
| Citric acid               | KRKNYBCHXYNGOX-UHFFFAOYSA-N  |
| Formic acid               | BDAGIHXWWSANSR-UHFFFAOYSA-N  |
| Fumaric acid              | VZCYOOQTPOCHFL-OWOJBTEDSA-N  |
| Malic acid                | BJEPYKJPYRNKOW-UHFFFAOYSA-N  |
| Succinic acid             | KDYFGRWQOYBRFD-UHFFFAOYSA-N  |
| Acetic acid               | QTBSBXVTEAMEQO-UHFFFAOYSA-N  |
| Alanine                   | QNAYBMKLOCPYGJ-UWTATZPHSA-N  |
| GABA                      | BTCSSZJGUNDROE-UHFFFAOYSA-N  |
| Glutamine                 | ZDXPYRJPNDTMRX-GSVUUGTGSA-N  |
| Isoleucine                | AGPKZVBTJJNPAG-CRCLSJGQSA-N  |
| Leucine                   | ROHFNLRQFUQHCH-RXMQYKEDSA-N  |
| Valine                    | KZSNJWFQEVHDMF-SCSAIBSYSA-N  |
| Threonine                 | AYFVYJQAPQTCCC-STHAYSLISA-N  |
| Asparagine                | DCXYFEDJOCDNAF-UWTATZPHSA-N  |
| Aspartate                 | CKLJMWZIZZHCS-REOHCLBHSA-N   |
| Glutamate                 | WHUUTDBJXJRKMK-UHFFFAOYSA-M  |
| Proline                   | ONIBWKKTOPOVIA-SCSAIBSYSA-N  |
| Choline                   | OEYIOHPDSNJKLS-UHFFFAOYSA-N  |
| Trigonelline              | WWNNZCOKKKDOPX-UHFFFAOYSA-N  |
